# Supplementary material for: Time trends in and factors associated with repeat adolescent birth in Uganda: Analysis of six demographic and health surveys
Source: PubMed Central journal article supplement (PMC7156070; doi:10.1371/journal.pone.0231557), 2020-04-14
Supplement: pone.0231557.s001.pdf [file pone.0231557.s001.pdf]

**S1 table: Percent point difference in repeat adolescent birth between surveys among Uganda women age 20-24 years,all UDHS surveys**

| <b>ALL WOMEN AGE 20-24 YEARS</b>                                |                     |                       |                      |                     |
|-----------------------------------------------------------------|---------------------|-----------------------|----------------------|---------------------|
| <b>Intervals</b>                                                | <b>5 years</b>      | <b>5 years</b>        | <b>5 years</b>       | <b>5 years</b>      |
|                                                                 | <b>1988/89-1995</b> | <b>1995-2000/01</b>   | <b>2000/01-2006</b>  | <b>2006-2011</b>    |
| <b>Percentage Point difference (P-value)</b>                    | -0.3<br>(0.864)     | +2.3<br>(0.144)       | -3.1<br>(0.043)      | -3.1<br>(0.031)     |
| <b>Intervals</b>                                                | <b>5 years</b>      | <b>First 15 years</b> | <b>Last 15 years</b> | <b>30 years</b>     |
|                                                                 | <b>2011-2016</b>    | <b>1988/89-2000</b>   | <b>2006-2016</b>     | <b>1988/89-2016</b> |
| <b>Percentage Point difference (P-value)</b>                    | -4.6<br>(<0.001)    | +2.0<br>(<0.001)      | -7.7<br>(<0.001)     | -8.8<br>(<0.001)    |
| <b>WOMEN 20-24 YEARS WITH 1<sup>ST</sup> BIRTH &lt;18 YEARS</b> |                     |                       |                      |                     |
| <b>Intervals</b>                                                | <b>5 years</b>      | <b>5 years</b>        | <b>5 years</b>       | <b>5 years</b>      |
|                                                                 | <b>1988/89-1995</b> | <b>1995-2000/01</b>   | <b>2000/01-2006</b>  | <b>2006-2011</b>    |
| <b>Percentage Point difference (P-value)</b>                    | +3.3<br>(0.289)     | +1.1<br>(0.689)       | +3.5<br>(0.197)      | -5.1<br>(0.073)     |
| <b>Intervals</b>                                                | <b>5 years</b>      | <b>First 15 years</b> | <b>Last 15 years</b> | <b>30 years</b>     |
|                                                                 | <b>2011-2016</b>    | <b>1988/89-2000</b>   | <b>2006-2016</b>     | <b>1988/89-2016</b> |
| <b>Percentage point difference (P-value)</b>                    | -6.1<br>(0.019)     | +4.4<br>(0.154)       | -11.2<br>(<0.001)    | -3.3<br>(0.251)     |
